# Supplementary material for: Methods for acquiring MRI data in children with autism spectrum disorder and intellectual impairment without the use of sedation
Source: PubMed Central journal article supplement (PMC4858915; doi:10.1186/s11689-016-9154-9), 2016-05-05
Supplement: 11689_2016_9154_MOESM4_ESM.pdf [file 11689_2016_9154_MOESM4_ESM.pdf]

Supplementary Table 1. T-scores and age equivalent scores for the DAS subscales

| Partici-<br>pant | Recall of<br>Designs |              | Word<br>Definitions |              | Verbal<br>Similiarites |              | Sequential<br>and<br>Quantitative<br>Reasoning |              | Matrices    |              | Pattern<br>Recognition |              |
|------------------|----------------------|--------------|---------------------|--------------|------------------------|--------------|------------------------------------------------|--------------|-------------|--------------|------------------------|--------------|
|                  | t-<br>score          | Age<br>equiv | t-<br>score         | Age<br>equiv | t-<br>score            | Age<br>equiv | t-<br>score                                    | Age<br>equiv | t-<br>score | Age<br>equiv | t-<br>score            | Age<br>equiv |
| <b>1</b>         | 40                   | 85           | 25                  | 58           | 26                     | 67           | 27                                             | 61           | 27          | 49           | 32                     | 64           |
| <b>2</b>         | 10                   | 58           | 10                  | 58           | 10                     | 58           | 17                                             | 58           | 10          | 43           | 10                     | 31           |
| <b>3</b>         | 45                   | 100          | 31                  | 70           | 24                     | 67           | 33                                             | 76           | 31          | 64           | 42                     | 94           |
| <b>4</b>         | 10                   | 58           | 10                  | 58           | 10                     | 58           | 16                                             | 58           | 10          | 43           | 10                     | 31           |
| <b>5</b>         | 10                   | 58           | 10                  | 58           | 10                     | 58           | 28                                             | 67           | 33          | 73           | 10                     | 31           |
| <b>6</b>         | 20                   | 61           | 10                  | 58           | 10                     | 58           | 22                                             | 58           | 26          | 52           | 24                     | 55           |
| <b>7</b>         | 10                   | 58           | 10                  | 58           | 10                     | 58           | 15                                             | 58           | 23          | 43           | 57                     | 147          |
| <b>8</b>         | 26                   | 79           | 10                  | 117          | 10                     | 88           | 25                                             | 117          | 21          | 100          | 28                     | 82           |
| <b>9</b>         | 30                   | 58           | 43                  | 64           | 28                     | 58           | 42                                             | 67           | 37          | 79           | 33                     | 58           |
| <b>10</b>        | 10                   | 58           | 21                  | 58           | 10                     | 58           | 23                                             | 58           | 31          | 43           | 22                     | 61           |
| <b>11</b>        | 10                   | 76           | 10                  | 58           | 10                     | 58           | 10                                             | 70           | 10          | 43           | 23                     | 31           |
| <b>12</b>        | 29                   | 91           | 10                  | 58           | 10                     | 58           | 24                                             | 94           | 17          | 76           | 10                     | 111          |
| <b>13</b>        | 33                   | 70           | 10                  | 58           | 10                     | 58           | 32                                             | 67           | 29          | 43           | 39                     | 64           |
| <b>14</b>        | 53                   | 135          | 45                  | 106          | 53                     | 129          | 66                                             | 177          | 78          | 213          | 51                     | 123          |
| <b>15</b>        | 46                   | 123          | 62                  | 183          | 63                     | 216          | 46                                             | 129          | 50          | 141          | 46                     | 123          |
| <b>16</b>        | 53                   | 153          | 47                  | 129          | 55                     | 165          | 43                                             | 117          | 54          | 171          | 54                     | 159          |
| <b>17</b>        | 67                   | 216          | 28                  | 88           | 35                     | 106          | 44                                             | 135          | 51          | 171          | 68                     | 216          |

Participant numbers match those depicted in Tables 1 and 2 of main text.  
 Participants 1-13 have IQs in the range of ID
